# Supplementary material for: Phylotranscriptomics: Saturated Third Codon Positions Radically Influence the Estimation of Trees Based on Next-Gen Data
Source: PubMed Central journal article supplement — Genome Biol Evol. 2013 Oct 21;5(11):2082–92. doi: 10.1093/gbe/evt157 (PMC3845638; doi:10.1093/gbe/evt157), 2013-10-21
Supplement: supp_evt157_Supp_Figs_Revised_with_legends_final.pdf [file supp_evt157_Supp_Figs_Revised_with_legends_final.pdf]

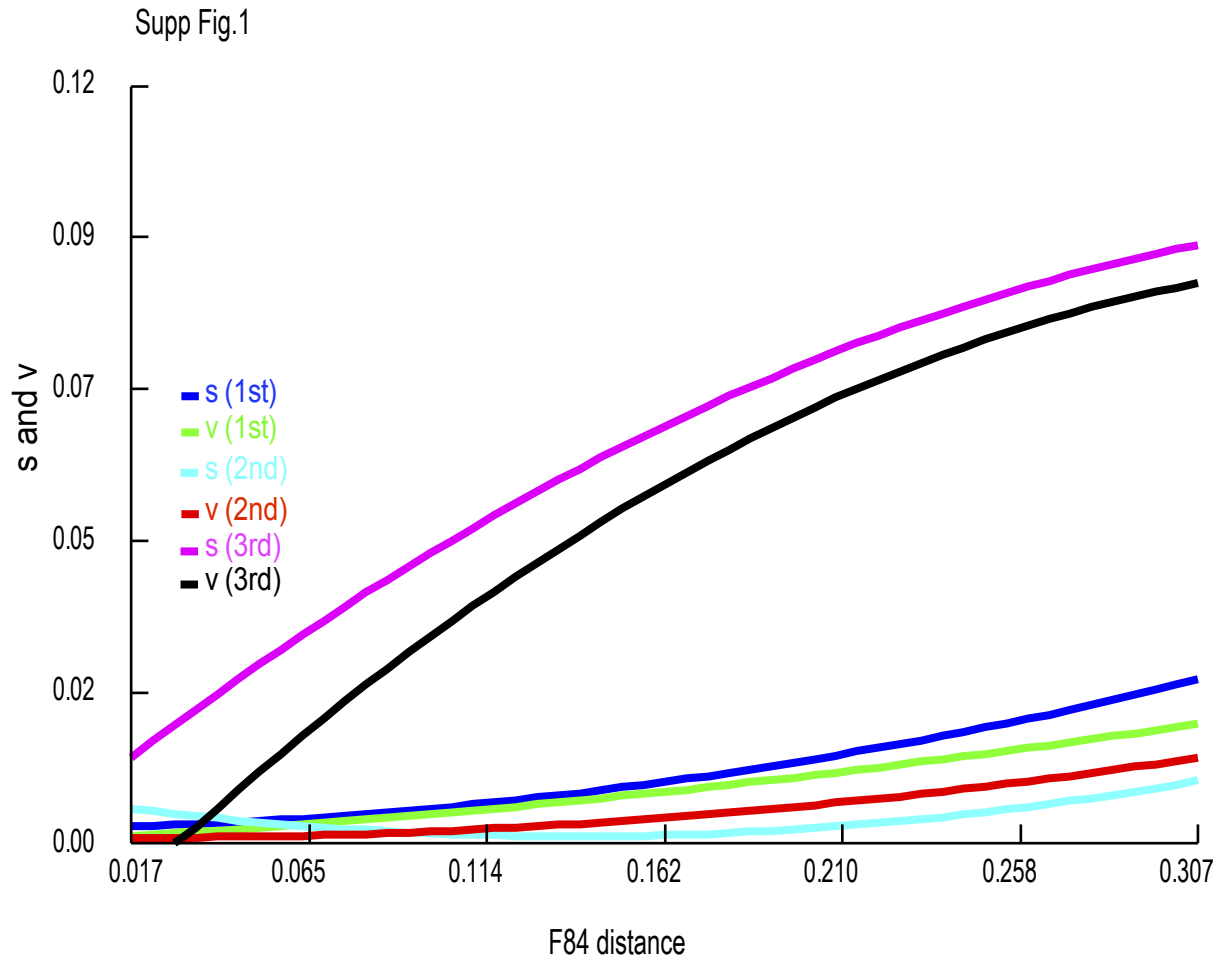

Fig. S1. Saturation plot for each codon position with transversions (v) and transitions (s) plotted against F84 distance.

Supp. Fig. 2

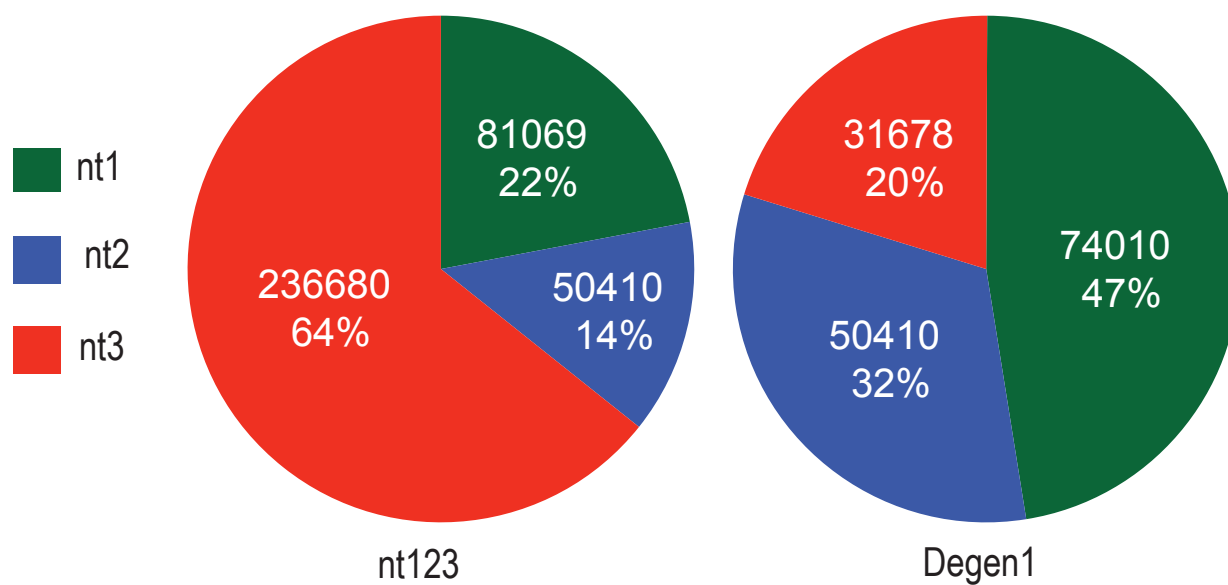

Fig. S2. Pie charts showing the number of variable sites and percent of total variable sites by codon position from nt123 and degen1 matrices.
